# Supplementary material for: The dual BCL-2 and BCL-XL inhibitor AZD4320 acts on-target and synergizes with MCL-1 inhibition in B-cell precursor ALL
Source: PubMed Central journal article supplement — Blood Adv. 2024 Oct 9;8(23):6035–42. doi: 10.1182/bloodadvances.2024013194 (PMC11635643; doi:10.1182/bloodadvances.2024013194), 2024-10-09

1 **Supplementary information to**

2

3 **The dual BCL-2 and BCL-XL inhibitor AZD4320 acts on-target and synergizes**  
4 **with MCL-1 inhibition in B-cell precursor ALL**

5

6 **Materials and Methods:**

7 **Cell lines**

8 Seven different BCP-ALL cell lines were used: RS4;11, KOPN-8, REH, EU-3, RCH-  
9 ACV and NALM-6 (purchased from DSMZ, Germany), UoCB6 (provided by J. Rowley,  
10 USA). Cell lines were cultured in RPMI-1640, 20% fetal bovine serum, 1% L-Glutamine  
11 and 1% Penicillin/Streptomycin. Cell lines were authenticated by short-tandem repeat  
12 (STR)-profiling (GenePrint 10 System, Promega) and tested for negativity of  
13 mycoplasma (MycoAlert Mycoplasma Detection Kit, Lonza).

14

15 **Patient-derived xenograft samples**

16 Samples were collected from patients with BCP-ALL after obtaining informed written  
17 consent in accordance with institutional ethics review board guidelines. Patient-derived  
18 xenograft (PDX) samples were established by intravenously transplanting ALL cells  
19 into female NOD/SCID mice (NOD.CB17-Prkdcscid, Charles River), following  
20 established protocols<sup>1</sup>. Animal experiments received approval (RP Tübingen, No.  
21 1260). Genetic alterations of the samples were assessed by Multiplex Ligation-  
22 dependent Probe Amplification (MLPA) and RT-PCR, as previously described<sup>2</sup>. For *ex*  
23 *vivo* experiments analyzing EC<sub>50</sub> values, PDX samples were cultured in AIM V medium  
24 (Gibco) without supplements.

25

## 26 **Cell death assays**

27 Cell death rates were assessed by propidium iodide (PI, P3566, Invitrogen) staining  
28 following exposure to AZD4320 and AZD5991 for 48h in cell lines and for 24h in PDX  
29 samples. To determine the half maximal effective concentration ( $EC_{50}$ ), cells were  
30 exposed to eleven different concentrations (cell lines: 0.1, 1, 5, 10, 50, 100, 250, 500,  
31 1000, 5000 and 10000 nM; PDX samples: 0.1, 1, 2.5, 5, 10, 25, 50, 100, 500, 1000  
32 and 5000 nM) of each inhibitor. The  $EC_{50}$  values of venetoclax, A-1331852 and S63845  
33 have been published previously<sup>3</sup>. Combination effects in cell lines were analyzed using  
34 dose-response matrix analyses upon treatment with seven different concentrations of  
35 the inhibitors (0.1, 1, 2.5, 5, 10, 100 and 500 nM) for 48 hours. Samples were measured  
36 on an Attune NxT Flow Cytometer (Thermo Fisher) using an autosampler and analyzed  
37 using the FlowJo 10.7.1 software.

38

## 39 **ALL co-culture model with mesenchymal stroma cells (MSCs)**

40 Primary bone marrow hTERT-immortalized mesenchymal stroma cells (MSCs)<sup>4</sup> were  
41 kindly provided by Dario Campana. For co-culture experiments, MSCs were seeded  
42 on day -1 at  $5 \times 10^3$  per well in 96-well plates (REF83.3924, Sarstedt) in RPMI-1640  
43 medium supplemented with 20% fetal bovine serum, 1% L-Glutamine and 1%  
44 Penicillin/Streptomycin. After four hours,  $1 \times 10^5$  ALL PDX cells or PBMCs stained with  
45 1  $\mu$ M CellTrace Violet (C34557, Thermo Fisher) were added to the MSC cultures. On  
46 day 0, samples were exposed to increasing concentrations of the inhibitors (0.1, 1, 2.5,  
47 5, 10, 100 and 500 nM) in a drug matrix for 72 hours. Cell death rates were assessed  
48 on an Attune NxT Flow Cytometer (Thermo Fisher) with an autosampler using  
49 propidium iodide (PI) and CellTrace Violet staining to distinguish ALL PDX cells or  
50 PBMCs from MSCs. Data analysis was performed using FlowJo 10.7.1 software.

51

## 52 **Dynamic BH3 profiling**

53 Dynamic BH3 profiling was carried out as previously described<sup>5-7</sup>. RCH-ACV cells were  
54 exposed to AZD4320 or AZD5991 for two hours. Cells were then permeabilized using  
55 digitonin, and exposed to the pro-apoptotic peptides indicated. Thereafter, cells were  
56 stained using a viability marker (1:1000 Zombie Violet; 423113, BioLegend). Cells were  
57 then fixed (formaldehyde) and neutralized in N2 buffer. Finally, cells were incubated in  
58 an intracellular staining buffer (1:1000 Alexa Fluor 647 anti-Cytochrome c antibody;  
59 612310, BioLegend). Results were analyzed on an Attune NxT Flow Cytometer  
60 (Thermo Fisher) with an autosampler and processed with FlowJo 10.7.1.

61

## 62 **Western blot and immunoprecipitation**

63 Western blot analysis and immunoprecipitation were performed according to  
64 established protocols<sup>3</sup>. Protein extraction was performed with lysis buffer containing  
65 30 mM Tris-HCl, 1% Triton X-100 buffer, 10% glycerol. For immunoprecipitation, cell  
66 lysates were co-incubated with BIM (C34C5) Rabbit mAb (2933, Cell Signaling) at 4°C  
67 on a rotary overnight, followed by co-incubation with Protein A Agarose Beads (9863,  
68 Cell Signaling) for 2-4 hours at 4°C. The beads were then washed five times with lysis  
69 buffer and the precipitates were subjected to western blot analysis. For  
70 immunoblotting, the following antibodies were used: Bim (C34C5) Rabbit mAb (2933,  
71 Cell Signaling), Bcl-2 (124) Mouse mAb (15071, Cell Signaling), Bcl-xL (54H6) Rabbit  
72 mAb (2764, Cell Signaling), Mcl-1 (D2W9E) Rabbit mAb (94296, Cell Signaling),  $\alpha/\beta$ -  
73 Tubulin Antibody (2148, Cell Signaling) followed by mouse anti-rabbit IgG-HRP (sc-  
74 2357, Santa Cruz) or m-IgG<sub>k</sub> BP-HRP (sc-516102, Santa Cruz).

75

76 **Statistics**

77 Statistical analyses were conducted using GraphPad Prism 10 software and Microsoft  
78 Excel. Combination effects and synergy scores were analyzed using the Bliss  
79 independence model with Synergyfinder<sup>8-10</sup>.

80 **Supplementary References:**

81 1. Meyer LH, Eckhoff SM, Queudeville M, et al. Early relapse in ALL is identified  
82 by time to leukemia in NOD/SCID mice and is characterized by a gene signature  
83 involving survival pathways. *Cancer Cell*. 2011;19(2):206-217.

84 2. Boldrin E, Gaffo E, Niedermayer A, et al. MicroRNA-497/195 is tumor-  
85 suppressive and cooperates with CDKN2A/B in pediatric acute lymphoblastic  
86 leukemia. *Blood*. 2021.

87 3. Seyfried F, Stirnweiss FU, Niedermayer A, et al. Synergistic activity of combined  
88 inhibition of anti-apoptotic molecules in B-cell precursor ALL. *Leukemia*.  
89 2022;36(4):901-912.

90 4. Mihara K, Imai C, Coustan-Smith E, et al. Development and functional  
91 characterization of human bone marrow mesenchymal cells immortalized by enforced  
92 expression of telomerase. *Br J Haematol*. 2003;120(5):846-849.

93 5. Ryan J, Montero J, Rocco J, Letai A. iBH3: simple, fixable BH3 profiling to  
94 determine apoptotic priming in primary tissue by flow cytometry. *Biol Chem*.  
95 2016;397(7):671-678.

96 6. Montero J, Sarosiek KA, DeAngelo JD, et al. Drug-induced death signaling  
97 strategy rapidly predicts cancer response to chemotherapy. *Cell*. 2015;160(5):977-  
98 989.

99 7. Manzano-Munoz A, Alcon C, Menendez P, et al. MCL-1 Inhibition Overcomes  
100 Anti-apoptotic Adaptation to Targeted Therapies in B-Cell Precursor Acute  
101 Lymphoblastic Leukemia. *Front Cell Dev Biol*. 2021;9:695225.

102 8. Fouquier J, Guedj M. Analysis of drug combinations: current methodological  
103 landscape. *Pharmacol Res Perspect*. 2015;3(3):e00149.

104 9. Zhao W, Sachsenmeier K, Zhang L, Sult E, Hollingsworth RE, Yang H. A New  
105 Bliss Independence Model to Analyze Drug Combination Data. *J Biomol Screen*.  
106 2014;19(5):817-821.

107 10. Ianevski A, Giri AK, Aittokallio T. SynergyFinder 3.0: an interactive analysis and  
108 consensus interpretation of multi-drug synergies across multiple samples. *Nucleic  
109 Acids Res*. 2022;50(W1):W739-W743.

110

A

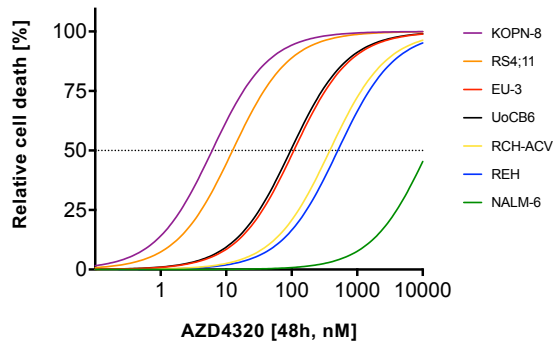

B

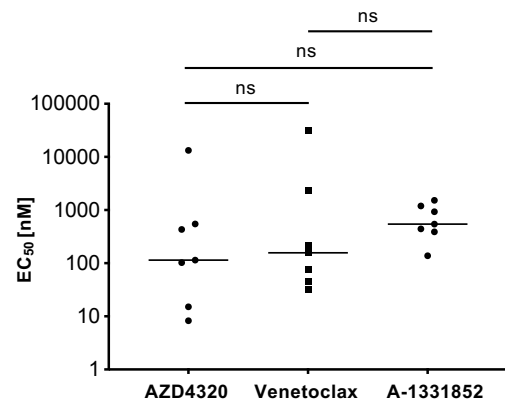

C

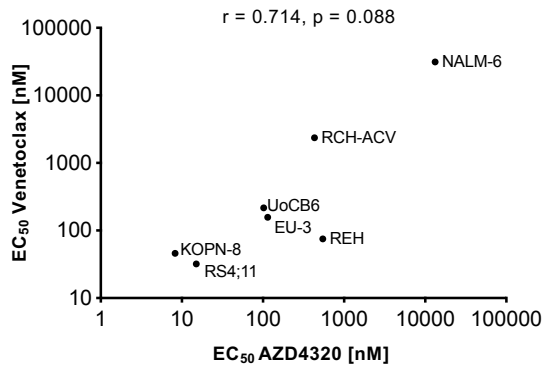

D

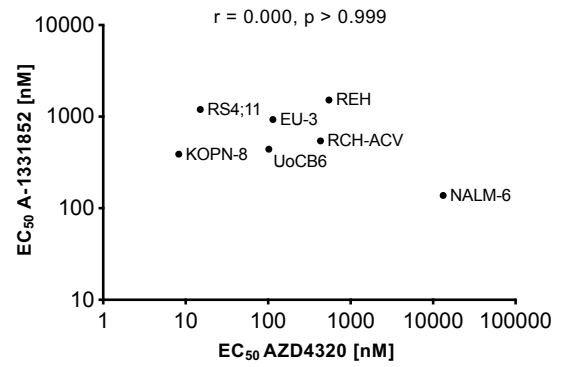

E

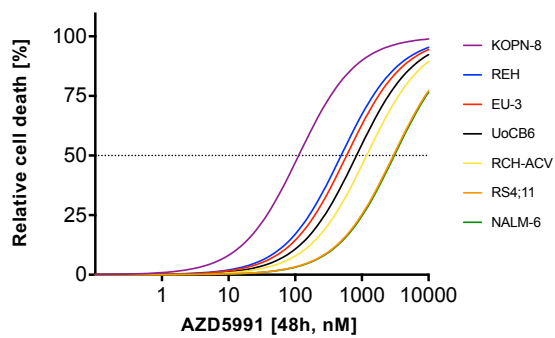

F

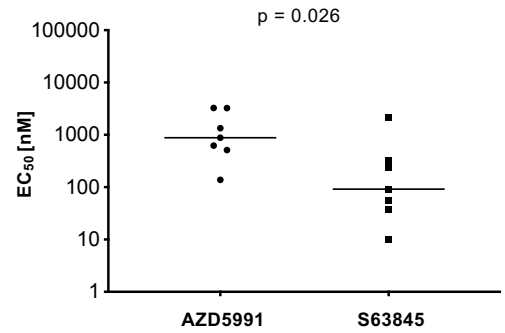

G

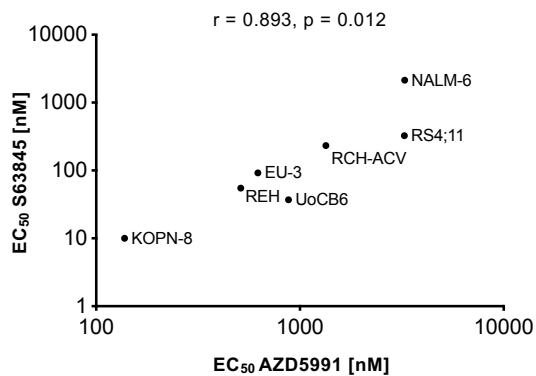

H

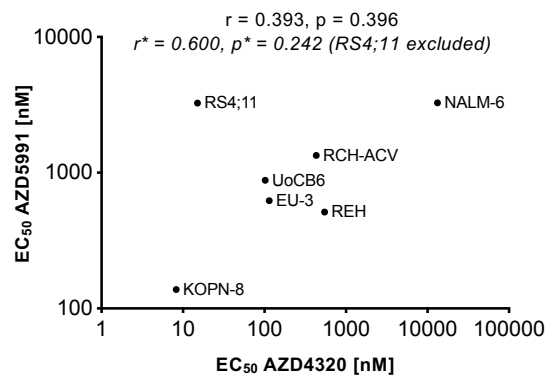

**Legend to Supplementary Figure 1. Varying sensitivities towards BH3-mimetics of BCP-ALL cell lines**

**(A)** Cell lines were exposed to eleven increasing concentrations (0.1, 1, 5, 10, 50, 100, 250, 500, 1000, 5000 and 10000 nM) of AZD4320 for 48 hours. Cell death rates were measured by propidium iodide (PI) staining.  $EC_{50}$  values were determined showing a range from 8.26 nM to 13.23  $\mu$ M and a median of 114.20 nM. **(B)** The sensitivity of AZD4320 (inhibiting BCL-2/BCL-XL) was compared with venetoclax (BCL-2) and A-1331852 (BCL-XL). The scatter plot shows individual  $EC_{50}$  values and the lines show medians. Mann-Whitney U-test; p, significance. **(C)** Correlation of the sensitivities of AZD4320 with venetoclax **(D)** and of AZD4320 with A-1331852. Spearman correlation; r, correlation coefficient; p, significance. **(E)** Cell death rates (PI) were assessed upon exposure of cell lines to eleven concentrations (0.1, 1, 5, 10, 50, 100, 250, 500, 1000, 5000 and 10000 nM) of AZD5991 for 48 hours.  $EC_{50}$  values ranged between 137.8 nM and 3.27  $\mu$ M with a median of 879.1 nM. **(F)** Comparison of sensitivities of two MCL-1 inhibitors. Mann-Whitney U-test; p, significance. **(G)** Spearman correlation of the  $EC_{50}$  values of both MCL-1 inhibitors **(H)** and of AZD4320 and AZD5991. Spearman correlation; r, correlation coefficient; p, significance;  $r^*$  and  $p^*$  indicate the correlation coefficient and significance, respectively, excluding the RS4;11 cell line. The  $EC_{50}$  values of venetoclax, A-1331852 and S63845 have been published previously (3).

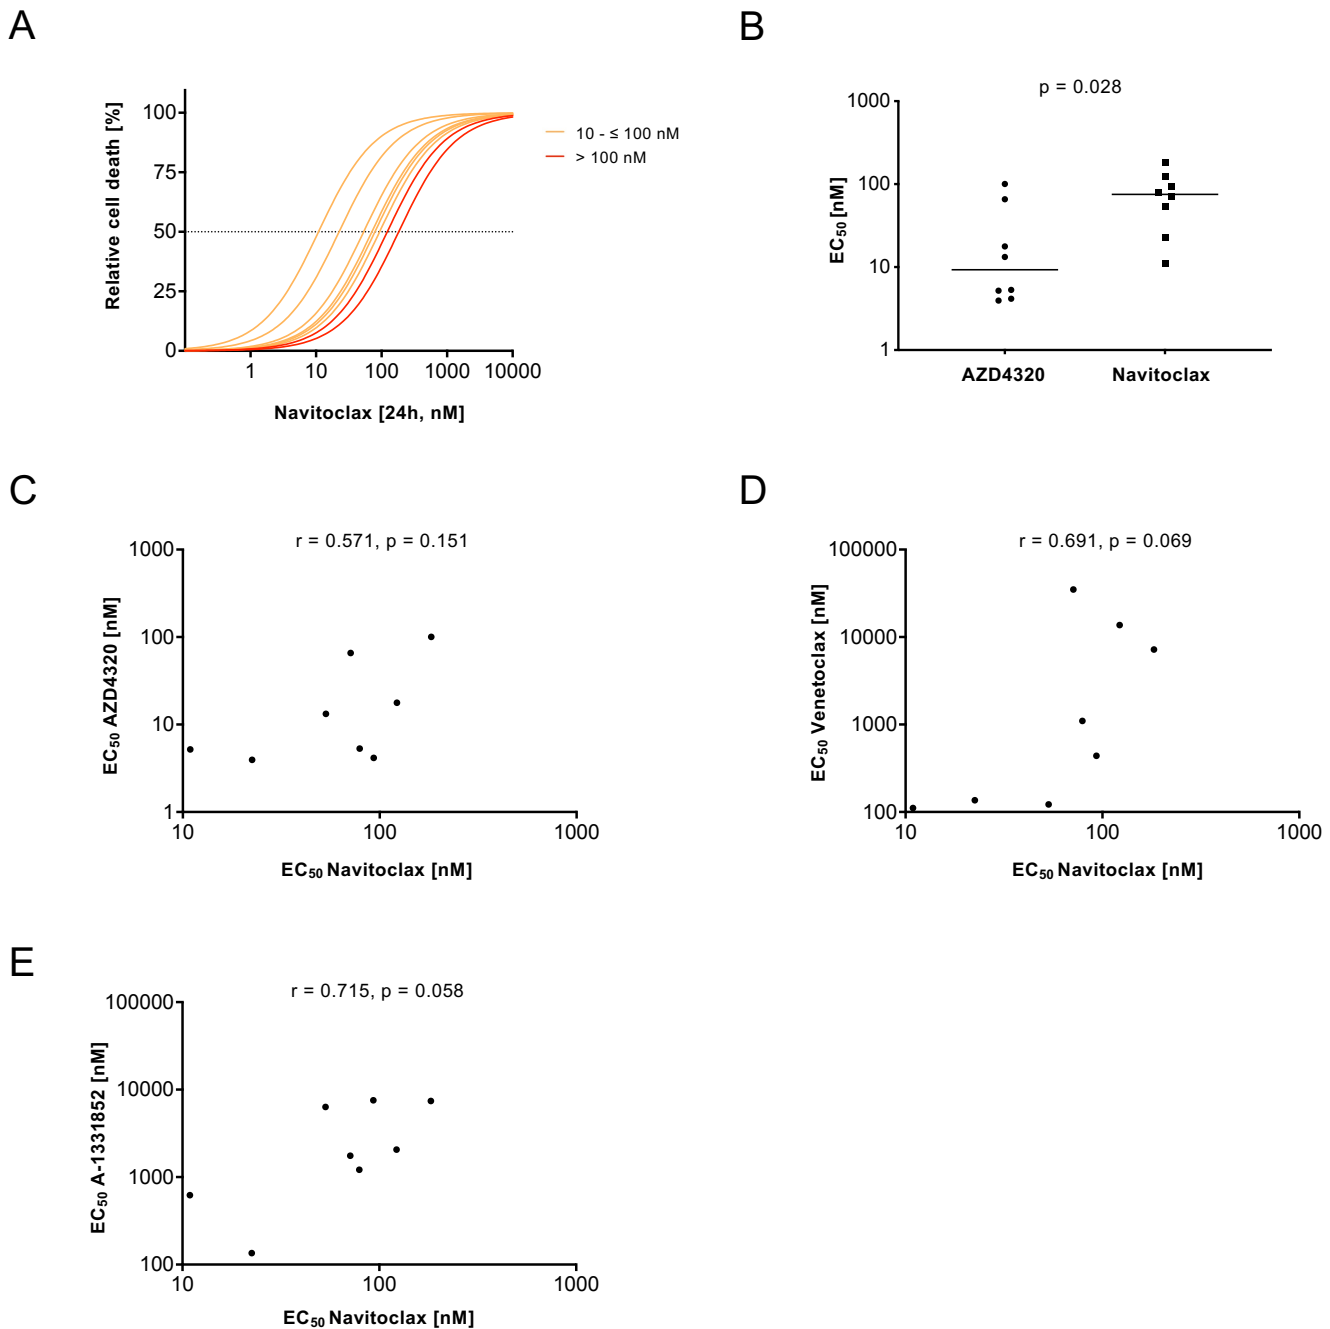

### Legend to Supplementary Figure 2. Varying sensitivities towards navitoclax in BCP-ALL patient-derived xenograft samples

**(A)** B-cell precursor acute lymphoblastic leukemia (BCP-ALL) patient-derived xenograft (PDX) samples (N=8) were cultured for 24 hours and exposed to eleven increasing concentrations (0.1, 1, 2.5, 5, 10, 25, 50, 100, 500, 1000 and 5000 nM) of the BCL-2/BCL-XL inhibitor navitoclax. Cell death rates were measured by propidium iodide (PI) staining. EC<sub>50</sub> values were determined showing a range from 10.91 to 182.9 nM and a median of 75.18 nM. **(B)** The sensitivity of navitoclax was compared with AZD4320 (both inhibiting BCL-2/BCL-XL). The scatter plot shows individual EC<sub>50</sub> values and the lines show medians. Mann-Whitney U-test; p, significance. **(C-E)** Correlation of the sensitivities of navitoclax with **(C)** AZD4320, **(D)** venetoclax and **(E)** A-1331852. Spearman correlation; r, correlation coefficient; p, significance.



A

**Supplementary Figure 3.** Characteristics of patient-derived xenograft samples and corresponding patients. **(A)** The samples are sorted based on the EC<sub>50</sub> values of AZD4320. The EC<sub>50</sub> values of venetoclax, A-1331852 and S63845 have been published previously (3).

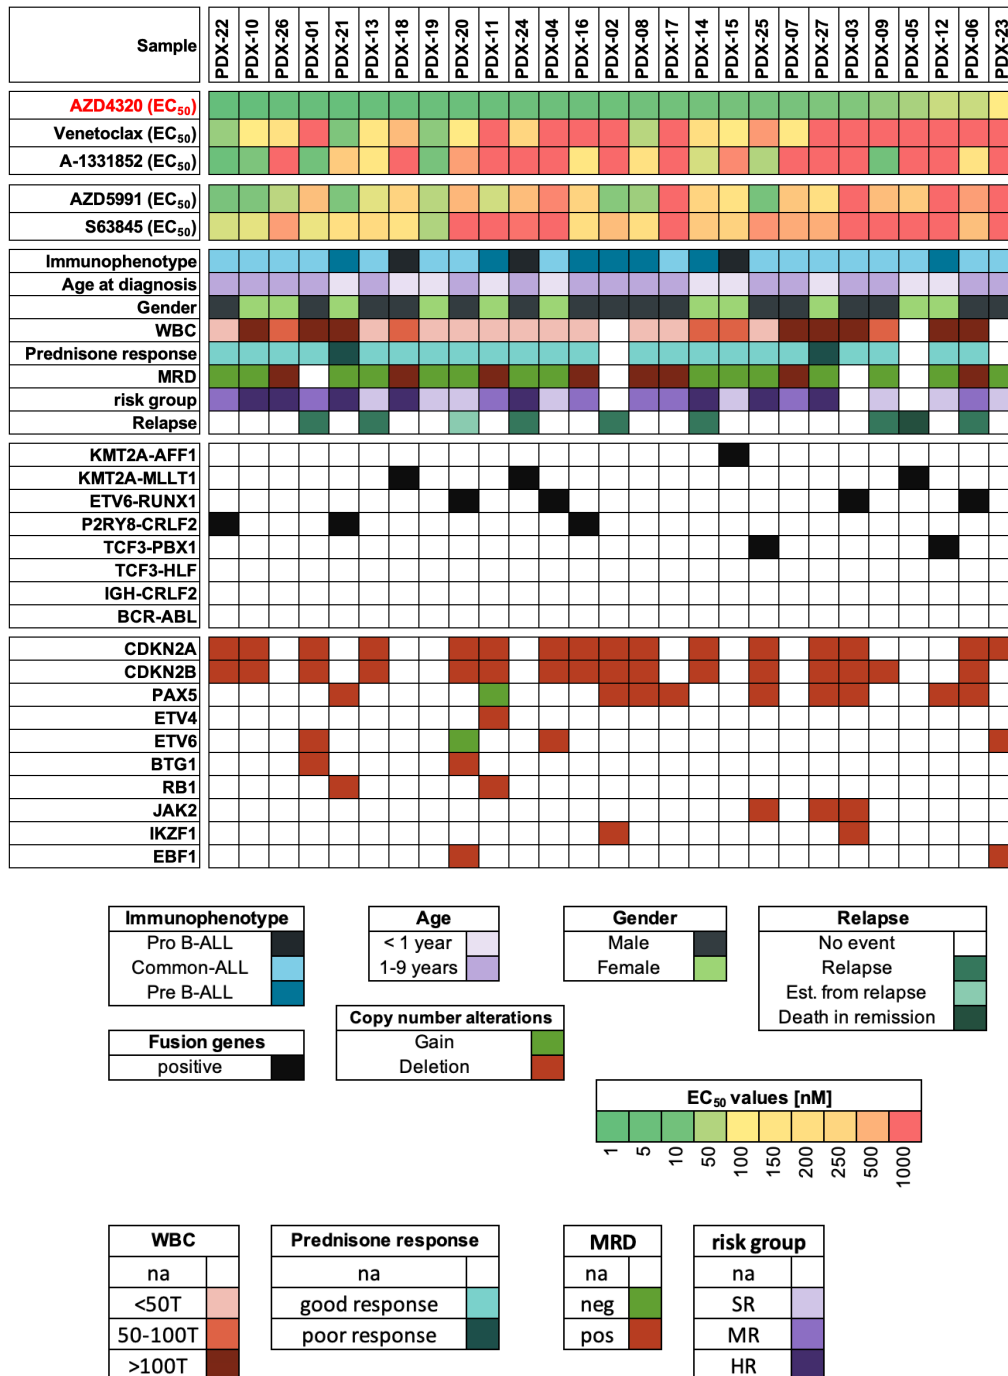

B

(B) The samples are sorted based on the EC<sub>50</sub> values of AZD5991.

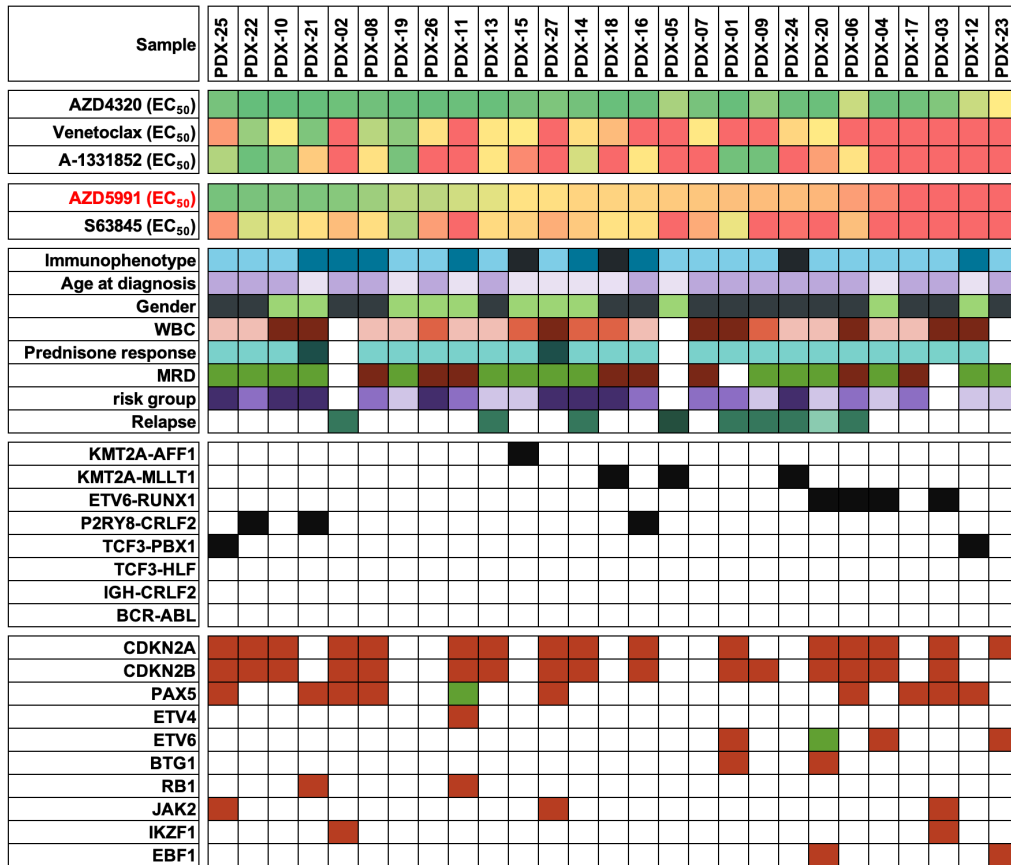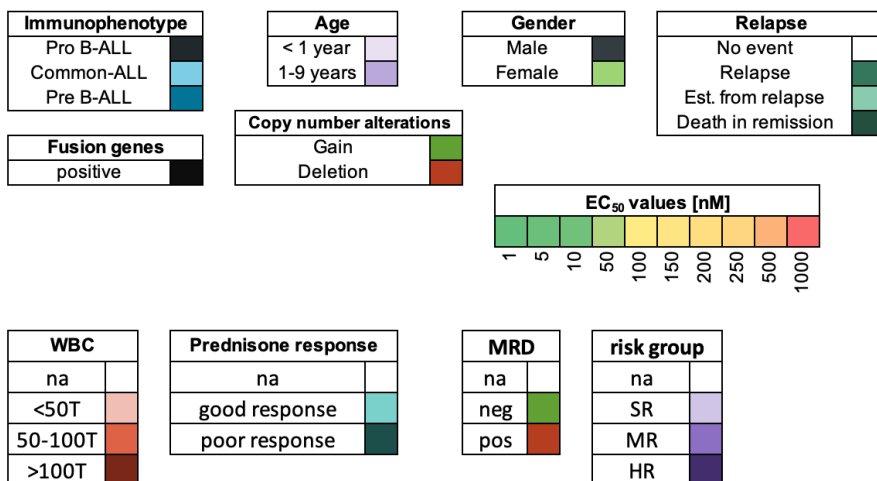

## Supplementary Figure 4. Co-immunoprecipitations of BIM BCP-ALL samples.

A

(A) Basal levels of proteins and protein complexes are shown in cell lines. N=3 independent experiments are shown.

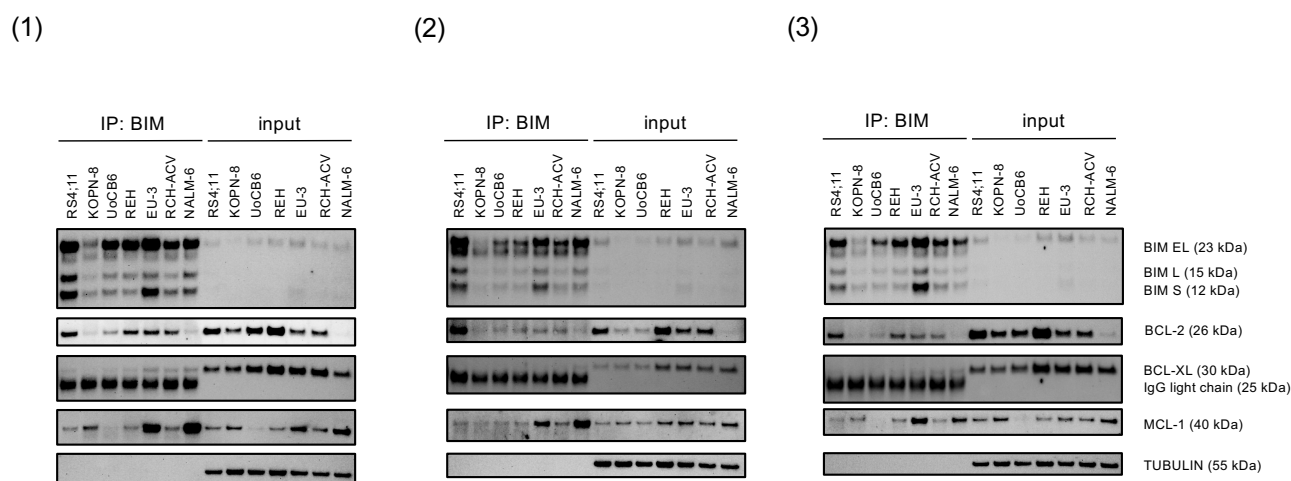

B

(B) Densitometric quantification of (a) protein levels (b) protein ratios and (c) protein complexes in ALL cell lines from N=3 independent experiments. Spearman correlation of proteins with the  $EC_{50}$  values of the compounds. A negative Spearman rho would indicate that sensitivity (low  $EC_{50}$ ) is correlated to a high level of protein or protein complex. N=7 cell lines;  $\rho$ , significance; significance level (Bonferroni-adjusted):  $P \leq 0.05/45 = P \leq 0.001$ .

| Compounds            |                   | AZD4320      |        | Venetoclax |        | A-1331852 |        | S63845 |        | AZD5991 |        |       |
|----------------------|-------------------|--------------|--------|------------|--------|-----------|--------|--------|--------|---------|--------|-------|
| (a)                  | Protein levels    | $r_s$        | p      | $r_s$      | p      | $r_s$     | p      | $r_s$  | p      | $r_s$   | p      |       |
| Input                | BCL-2             | 0.000        | 1.000  | -0.429     | 0.345  | 0.893     | 0.012  | -0.036 | 0.963  | -0.107  | 0.840  |       |
|                      | BCL-XL            | 0.714        | 0.088  | 0.714      | 0.088  | 0.071     | 0.906  | 0.464  | 0.302  | 0.321   | 0.498  |       |
|                      | MCL-1             | 0.393        | 0.396  | 0.464      | 0.302  | -0.429    | 0.354  | 0.571  | 0.200  | 0.357   | 0.444  |       |
| (b)                  | Protein ratios    | $r_s$        | p      | $r_s$      | p      | $r_s$     | p      | $r_s$  | p      | $r_s$   | p      |       |
|                      | Input             | BCL-2/BCL-XL | -0.464 | 0.302      | -0.750 | 0.066     | 0.643  | 0.139  | -0.286 | 0.556   | -0.214 | 0.662 |
|                      | BCL-2/MCL-1       | -0.143       | 0.783  | -0.250     | 0.595  | 0.607     | 0.167  | -0.321 | 0.498  | -0.143  | 0.783  |       |
| BCL-2/(BCL-XL+MCL-1) | -0.429            | 0.354        | -0.536 | 0.354      | 0.571  | 0.200     | -0.179 | 0.713  | 0.000  | 1.000   |        |       |
| (b)                  | Protein complexes | $r_s$        | p      | $r_s$      | p      | $r_s$     | p      | $r_s$  | p      | $r_s$   | p      |       |
|                      | IP: BIM           | BCL-2-BIM    | -0.429 | 0.345      | -0.857 | 0.024     | 0.714  | 0.088  | -0.143 | 0.783   | -0.321 | 0.498 |
|                      | BCL-XL-BIM        | -0.143       | 0.783  | 0.250      | 0.595  | -0.821    | 0.034  | -0.071 | 0.906  | 0.107   | 0.840  |       |
| MCL-1-BIM            | 0.071             | 0.906        | 0.143  | 0.783      | -0.536 | 0.236     | 0.000  | 1.000  | -0.214 | 0.662   |        |       |

C

(C) Basal levels of proteins and protein complexes are shown for PDX samples.

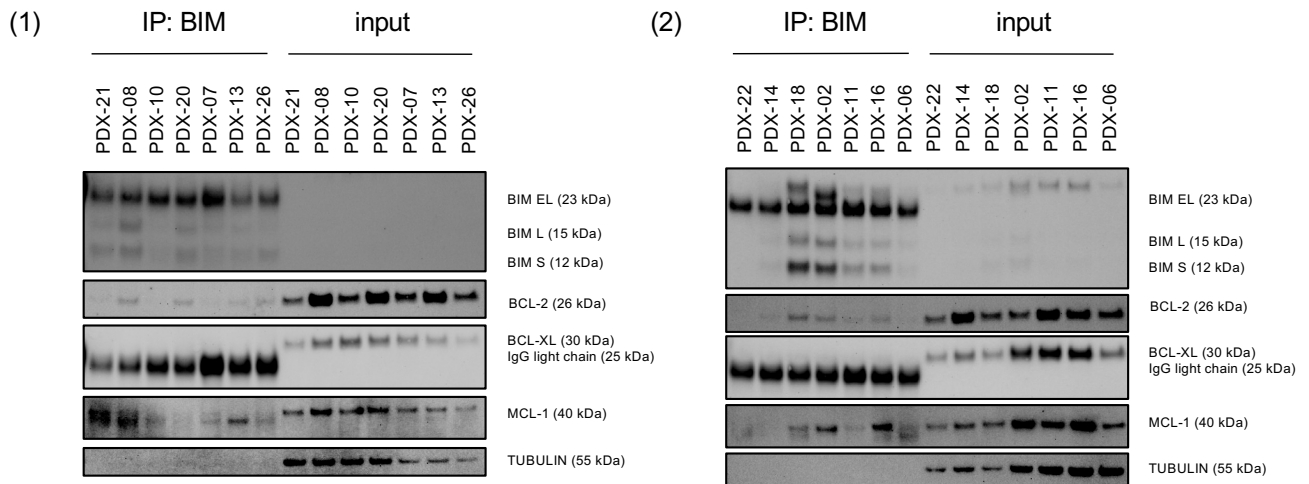

D

(D) Densitometric quantification of (a) protein levels, (b) protein ratios and (c) protein complexes in ALL PDX samples. Spearman correlation of proteins with the  $EC_{50}$  values of the compounds. A negative Spearman rho would indicate that sensitivity (low  $EC_{50}$ ) is correlated to a high level of protein or protein complex. N=14 PDX samples; p, significance; significance level (Bonferroni-adjusted):  $P \leq 0.05/45 = P \leq 0.001$ .

|     |                          | AZD4320              |        | Venetoclax |        | A-1331852 |        | S63845 |        | AZD5991 |        |       |
|-----|--------------------------|----------------------|--------|------------|--------|-----------|--------|--------|--------|---------|--------|-------|
| (a) | <b>Protein levels</b>    | $r_s$                | $p$    | $r_s$      | $p$    | $r_s$     | $p$    | $r_s$  | $p$    | $r_s$   | $p$    |       |
|     | Input                    | BCL-2                | -0.024 | 0.940      | -0.051 | 0.638     | 0.064  | 0.832  | 0.262  | 0.366   | 0.284  | 0.325 |
|     |                          | BCL-XL               | 0.231  | 0.427      | -0.165 | 0.445     | 0.332  | 0.246  | 0.319  | 0.267   | 0.152  | 0.605 |
|     |                          | MCL-1                | 0.103  | 0.727      | -0.077 | 0.739     | 0.543  | 0.048  | 0.196  | 0.502   | 0.253  | 0.382 |
| (b) | <b>Protein ratios</b>    | $r_s$                | $p$    | $r_s$      | $p$    | $r_s$     | $p$    | $r_s$  | $p$    | $r_s$   | $p$    |       |
|     | Input                    | BCL-2/BCL-XL         | 0.011  | 0.976      | 0.204  | 0.483     | -0.112 | 0.704  | 0.095  | 0.750   | 0.297  | 0.302 |
|     |                          | BCL-2/MCL-1          | 0.024  | 0.940      | 0.376  | 0.186     | -0.376 | 0.616  | 0.244  | 0.400   | 0.288  | 0.318 |
|     |                          | BCL-2/(BCL-XL+MCL-1) | -0.007 | 0.988      | 0.235  | 0.417     | -0.152 | 0.605  | 0.130  | 0.659   | 0.288  | 0.318 |
| (c) | <b>Protein complexes</b> | $r_s$                | $p$    | $r_s$      | $p$    | $r_s$     | $p$    | $r_s$  | $p$    | $r_s$   | $p$    |       |
|     | IP: BIM                  | BCL-2-BIM            | -0.240 | 0.409      | 0.051  | 0.868     | 0.182  | 0.532  | -0.042 | 0.892   | -0.108 | 0.716 |
|     |                          | BCL-XL-BIM           | -0.323 | 0.260      | -0.165 | 0.573     | 0.046  | 0.880  | 0.024  | 0.940   | -0.086 | 0.773 |
|     |                          | MCL-1-BIM            | 0.064  | 0.832      | -0.077 | 0.797     | -0.134 | 0.648  | -0.402 | 0.155   | -0.152 | 0.605 |

**Supplementary Figure 5.** Independent experiments of co-immunoprecipitations of BIM for **(A)** RCH-ACV corresponding to Figure 2A and for **(B)** NALM-6 corresponding to Figure 2B. Cells were exposed to the compounds at the concentrations indicated for four hours.

A

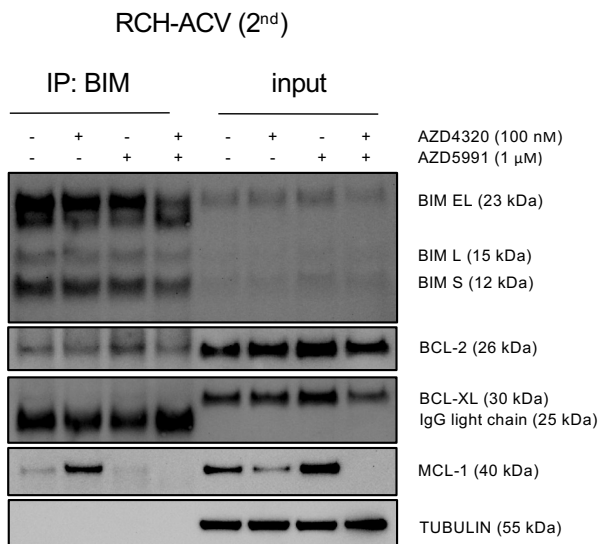

B

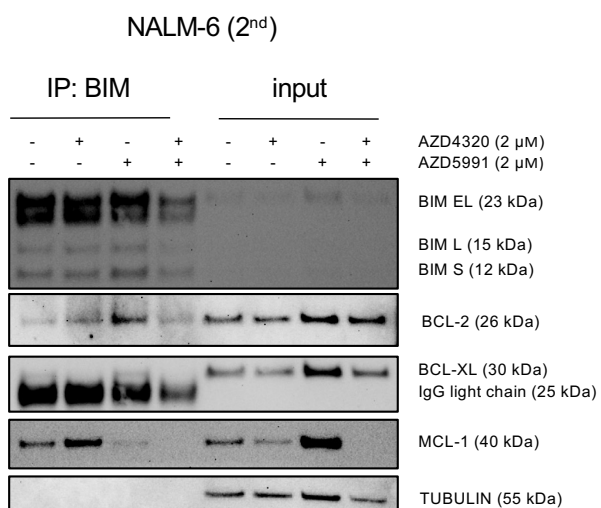

### Supplementary Figure 6. Combination effects of AZD4320 and AZD5991 in BCP-ALL cell lines

Dose-response matrix analyses were conducted in three BCP-ALL cell lines that are less sensitive to AZD4320 and/or AZD5991 alone. The cell lines were exposed to seven increasing concentrations (5, 25, 50, 100, 250, 500 and 1000 nM) of AZD4320 and/or AZD5991 in a drug matrix for 48 hours. Cell death rates were determined by propidium iodide staining and flow cytometry measurement. The heatmaps show cell death rates after drug exposure. Efficacy scores were calculated as the arithmetic mean of normalized cell death rates across the matrix. Synergy effects were visualized using Synergyfinder and synergy scores were analyzed using the Bliss independence model. Dashed lines indicate the most synergistic area (MSA). Mean values of two independent experiments are shown.

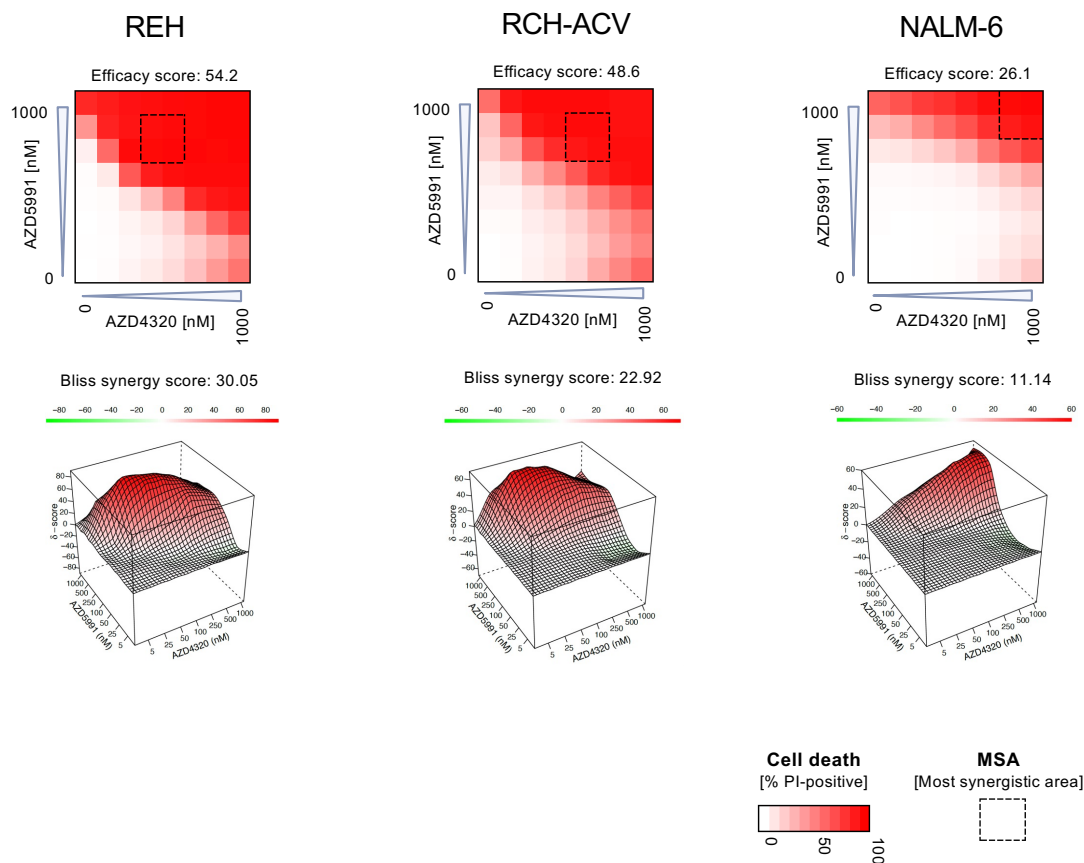

Supplement: BLOODA_ADV-2024-013194-mmc1.pdf [file BLOODA_ADV-2024-013194-mmc1.pdf]
